# Supplementary material for: Gliclazide in Binary and Ternary Systems Improves Physicochemical Properties, Bioactivity, and Antioxidant Activity
Source: Oxid Med Cell Longev. 2022 Nov 25;2022:2100092. doi: 10.1155/2022/2100092 (PMC9718633; doi:10.1155/2022/2100092)
Supplement: Supplementary Materials — Supplementary file includes data about induction of diabetes in rabbits using Alloxan. Graphical representation revealed that all values at different time zones (1st, 2nd, 3rd, 4th, 5th, 6th, 7th, and 8th hours) were significantly higher compared to initial fasting blood glucose levels (Supplementary Figure 1). [file 2100092.f1.docx]

**Gliclazide in Binary and Ternary Systems Improves Physicochemical Properties, Bioactivity, and Antioxidant Activity**

**Muhammad Ibrahim1, Shehla Munir1, Sarfraz Ahmed2, Adeel Hussain Chughtai3, Waqas Ahmad4, Jallat Khan5, Mogana Das Murtey6, Hira Ijaz7, Suvash Chandra Ojha8,9***

1Department of Biochemistry, Bahauddin Zakariya University, Multan, 60800, Pakistan

2Department of Basic Sciences, University of Veterinary and Animal Sciences, Narowal, 51600, Narowal, Pakistan

3Institute of Chemical Sciences, Bahauddin Zakariya University, Multan, 60800, Pakistan

4Department of Clinical Sciences, University of Veterinary and Animal Sciences, Narowal, 51600, Narowal, Pakistan

5Department of Chemistry, Khwaja Fareed University of Engineering & Information Technology, 64200, Rahim Yar Khan, Pakistan

6Basic Sciences and Oral Biology Unit, School of Dental Sciences, Health Campus, Universiti Sains Malaysia, 16150, Kubang Kerian, Kelantan Malaysia

7Department of Pharmacy, University of Faisalabad, Faisalabad, Pakistan

8Department of Infectious Diseases, The Affiliated Hospital of Southwest Medical University, Luzhou 646000, China

9Southwest Medical University, Jiangyang District, Luzhou 646000, Sichuan, China

***Correspondence:**

Suvash Chandra Ojha

[suvash_ojha@swmu.edu.cn](mailto:suvash_ojha@swmu.edu.cn)

**Figure 1:** Trend of immediate changes in blood glucose level of 11 groups of albino rabbits following administration of Alloxan monohydrate (150 mg/Kg body weight). P ≤ 0.05 was statistically significant.
